# Supplementary material for: Improved performance of perylenediimide-based lasers
Source: Royal Society of Chemistry journal article supplement (doi:10.1039/c2tc00383j), 2012-11-28
Supplement: c2tc00383j.pdf [file c2tc00383j.pdf]

## ELECTRONIC SUPPLEMENTARY INFORMATION

### Improved performance of perylene-diimide-based lasers

**M. G. Ramirez,<sup>a</sup> M. Morales-Vidal<sup>a</sup> V. Navarro-Fuster,<sup>a</sup> Pedro G. Boj,<sup>b</sup> J.A. Quintana,<sup>b</sup> J.M. Villalvilla,<sup>a</sup> A. Retolaza,<sup>c</sup> S. Merino<sup>c</sup> and María A. Díaz-García<sup>\*a</sup>**

<sup>a</sup> *Dpto. Física Aplicada, Instituto Universitario de Materiales de Alicante y Unidad Asociada UA-CSIC, Universidad de Alicante, 03080 Alicante, Spain.*

*\*Corresponding author E-mail: [maria.diaz@ua.es](mailto:maria.diaz@ua.es); Fax: +34 96 590 9726; Tel: +34 96 590 3543.*

<sup>b</sup> *Dpto. Óptica, Instituto Universitario de Materiales de Alicante y Unidad Asociada UA-CSIC, Universidad de Alicante, 03080 Alicante, Spain.*

<sup>c</sup> *Micro and Nanotechnology Department, Tekniker, Eibar 20600, Spain.*

**Fig. S1** ASE wavelength,  $\lambda_{\text{ASE}}$ , (a) and ASE linewidth,  $\text{FWHM}_{\text{ASE}}$ , (b) for PS films doped with different concentrations of PDI-C6 (full squares) and PDI-O (open triangles). The error is ( $\pm 0.4$ ) in the  $\lambda_{\text{ASE}}$  and ( $\pm 0.8$ ) in the  $\text{FWHM}_{\text{ASE}}$ .

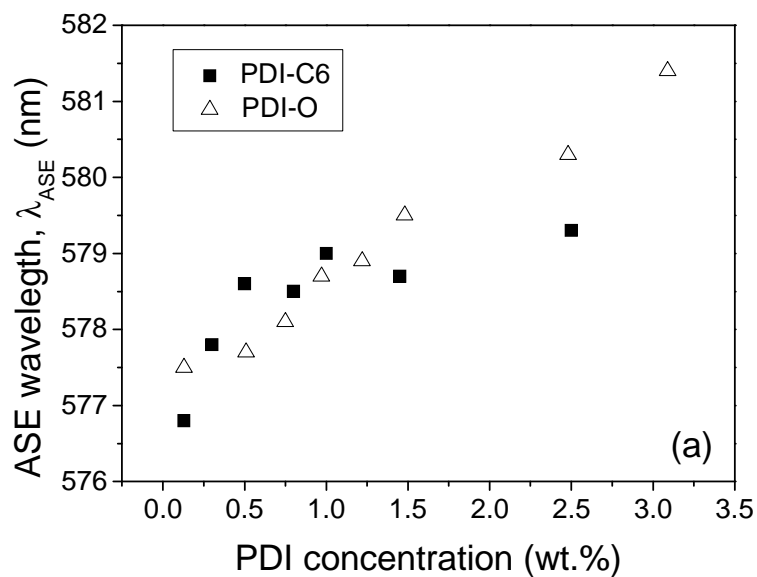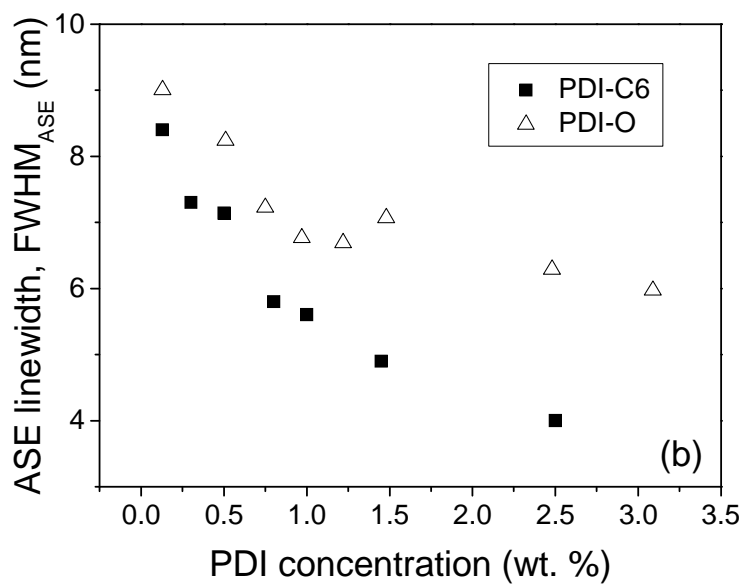

Fig. S2.  $^1\text{H}$  NMR (a) and  $^{13}\text{C}$  NMR (b) spectra of PDI-C6 in solution.

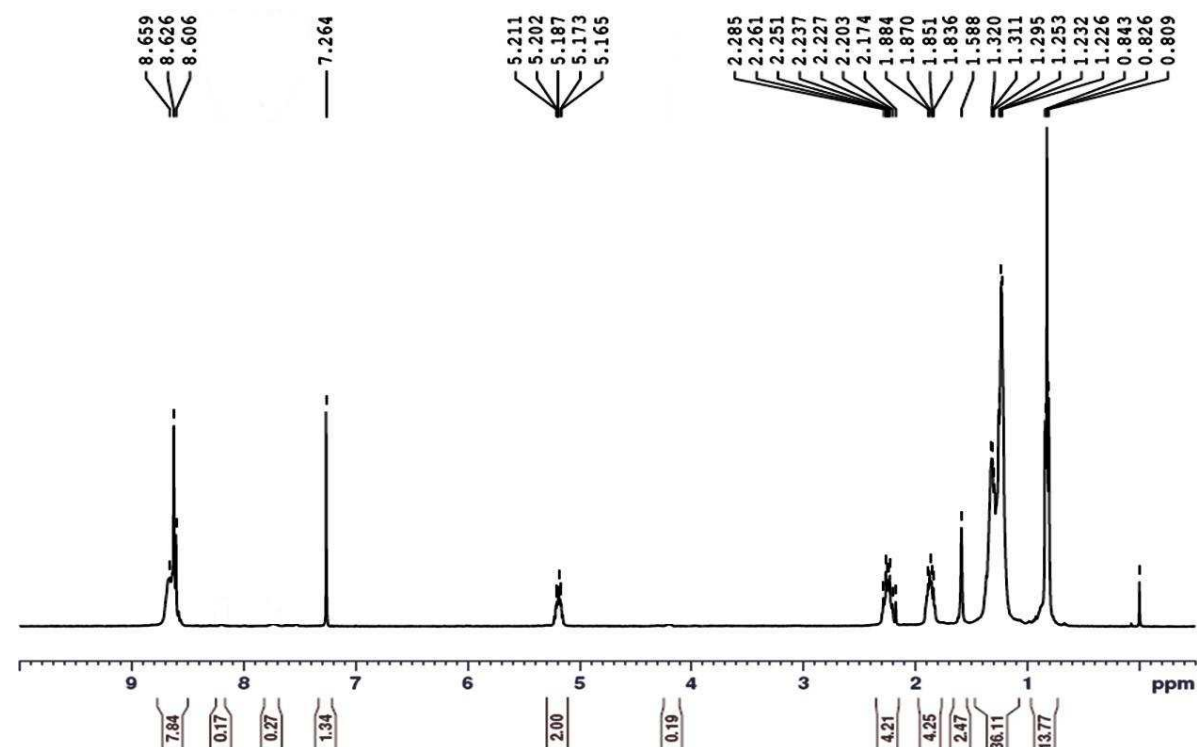

(a)

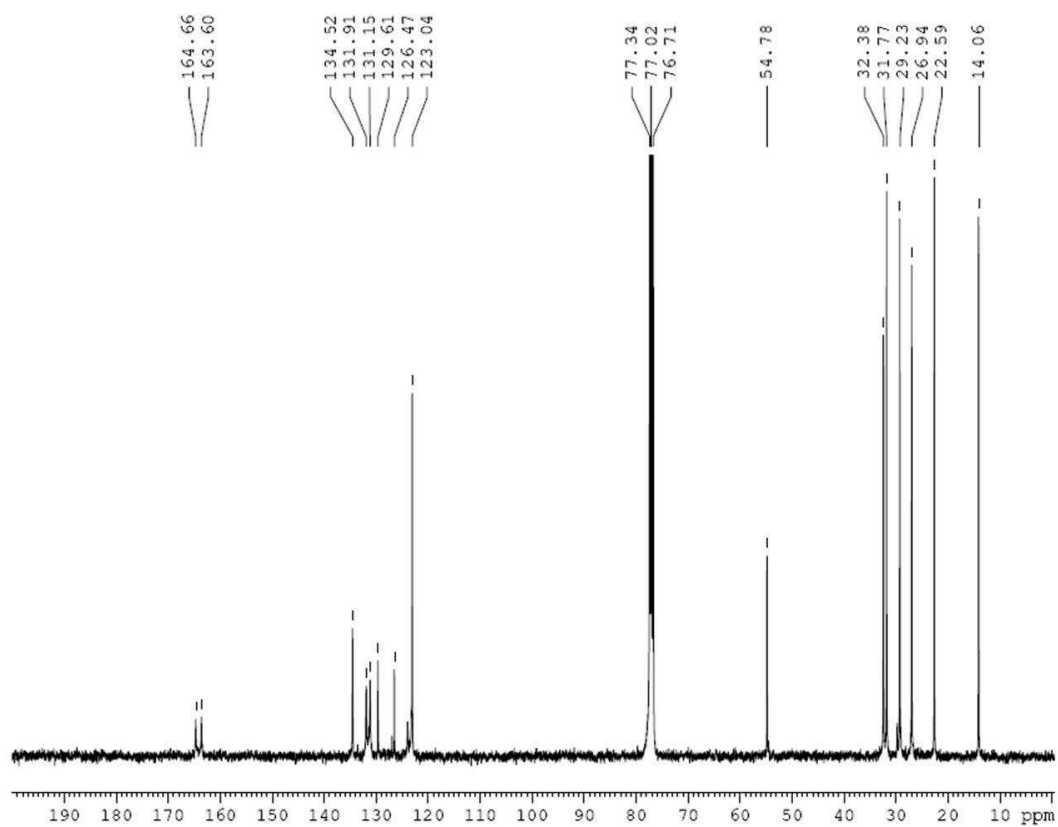

(b)

**Fig. S3.**  $^1\text{H}$  NMR (a) and  $^{13}\text{C}$  NMR (b) spectra of PDI-O in solution.

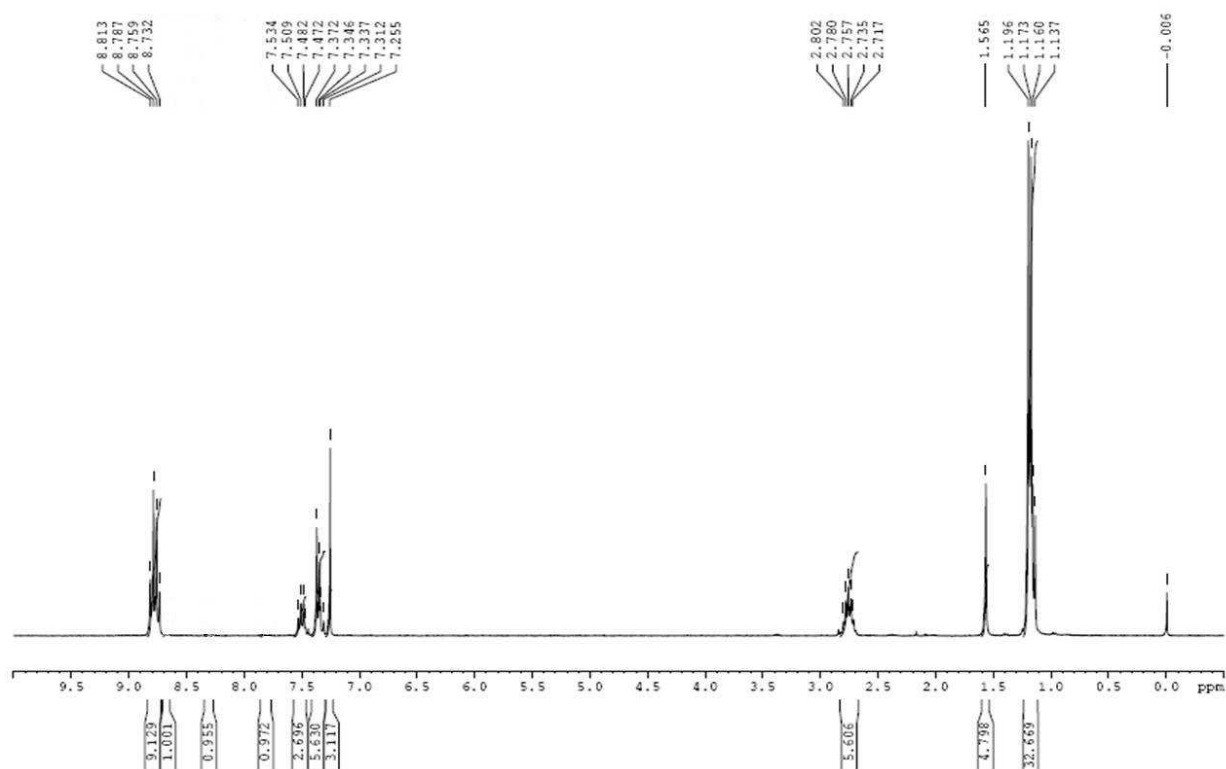

(a)

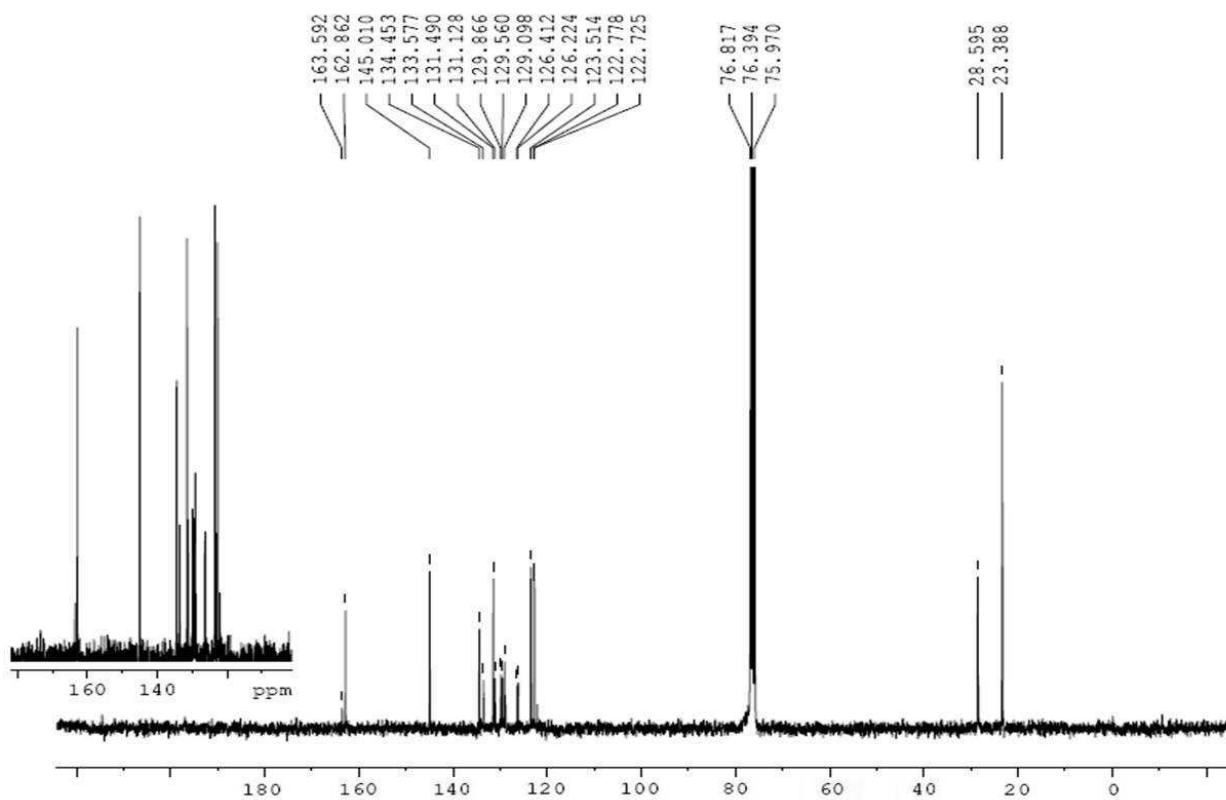

(b)
